# Supplementary material
Source: PubMed Central journal article supplement (PMC8635244)

Figure S2. Depletion of Components of Antiviral Response Pathways Modulates Sensitivity to the Spliceosome Modulator SD6, Related to Figure 2

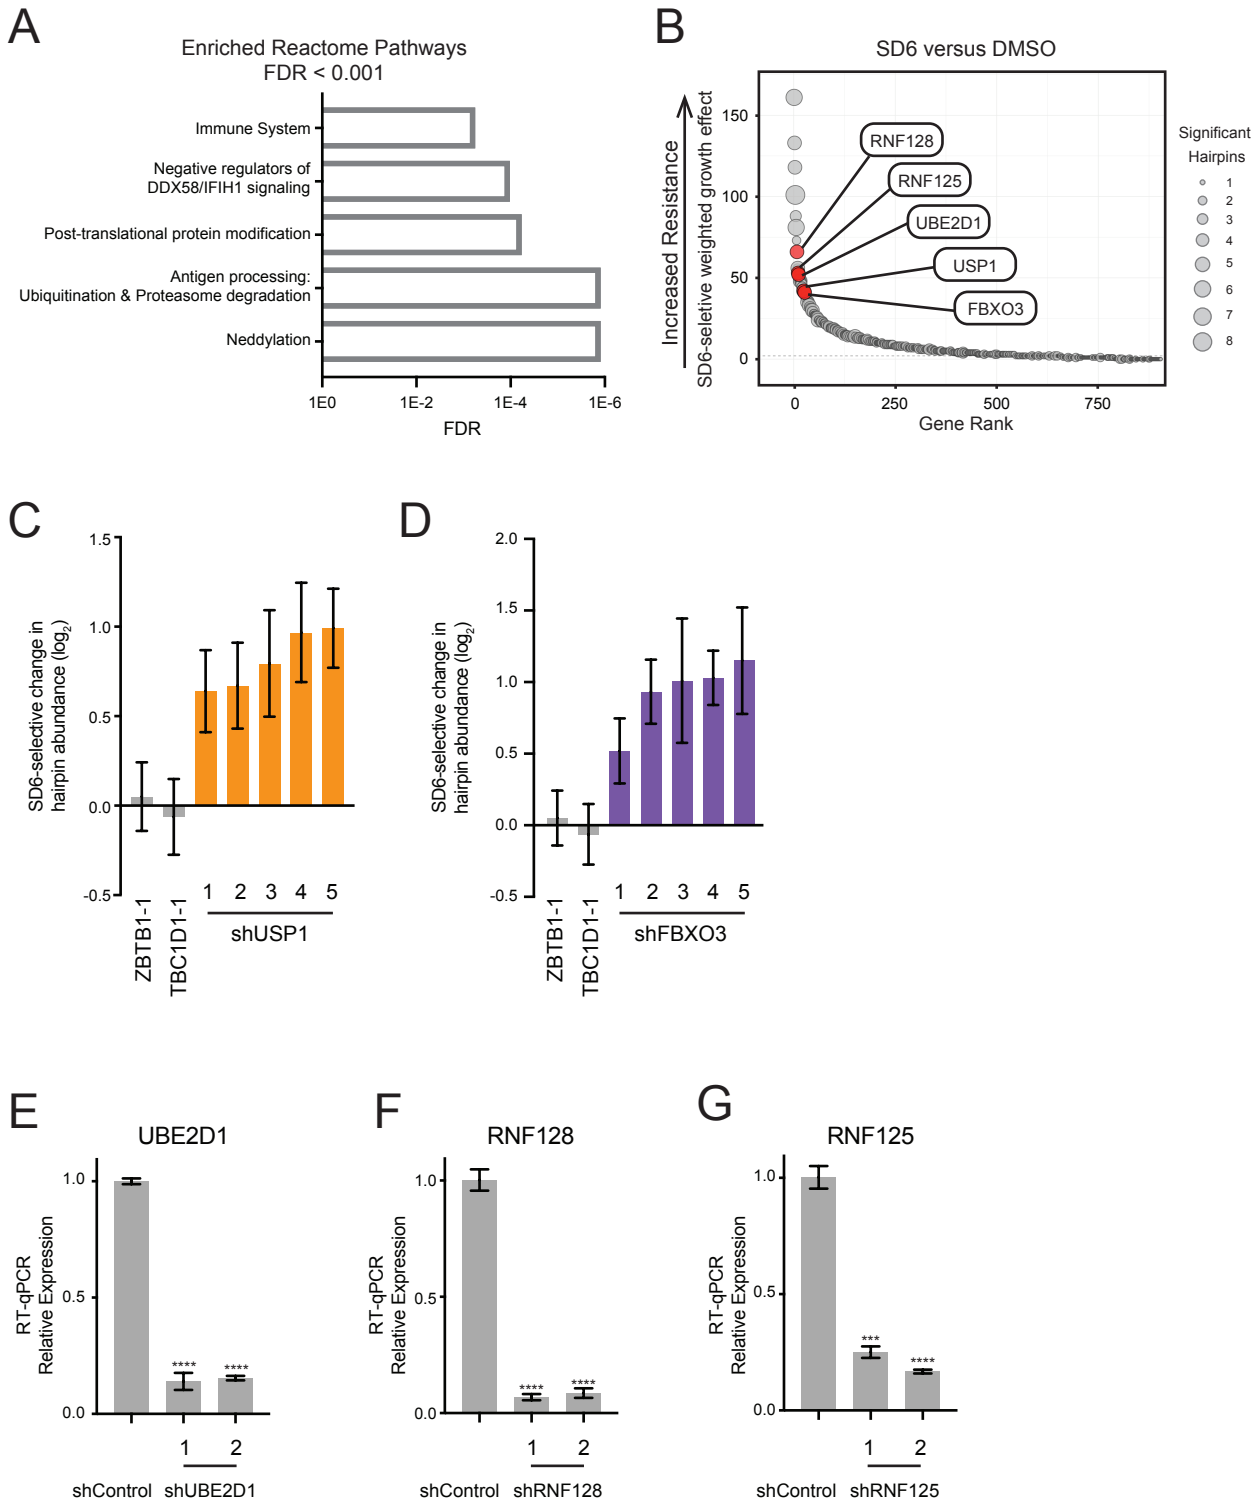

Supplement: NIHMS1663060-supplement-2.pdf [file NIHMS1663060-supplement-2.pdf]
