# Supplementary material
Source: PubMed Central journal article supplement (PMC8635244)

Figure S3. Spliceosome Inhibition Leads to Cytoplasmic dsRNA Accumulation across TNBC Models, Related to Figure 3

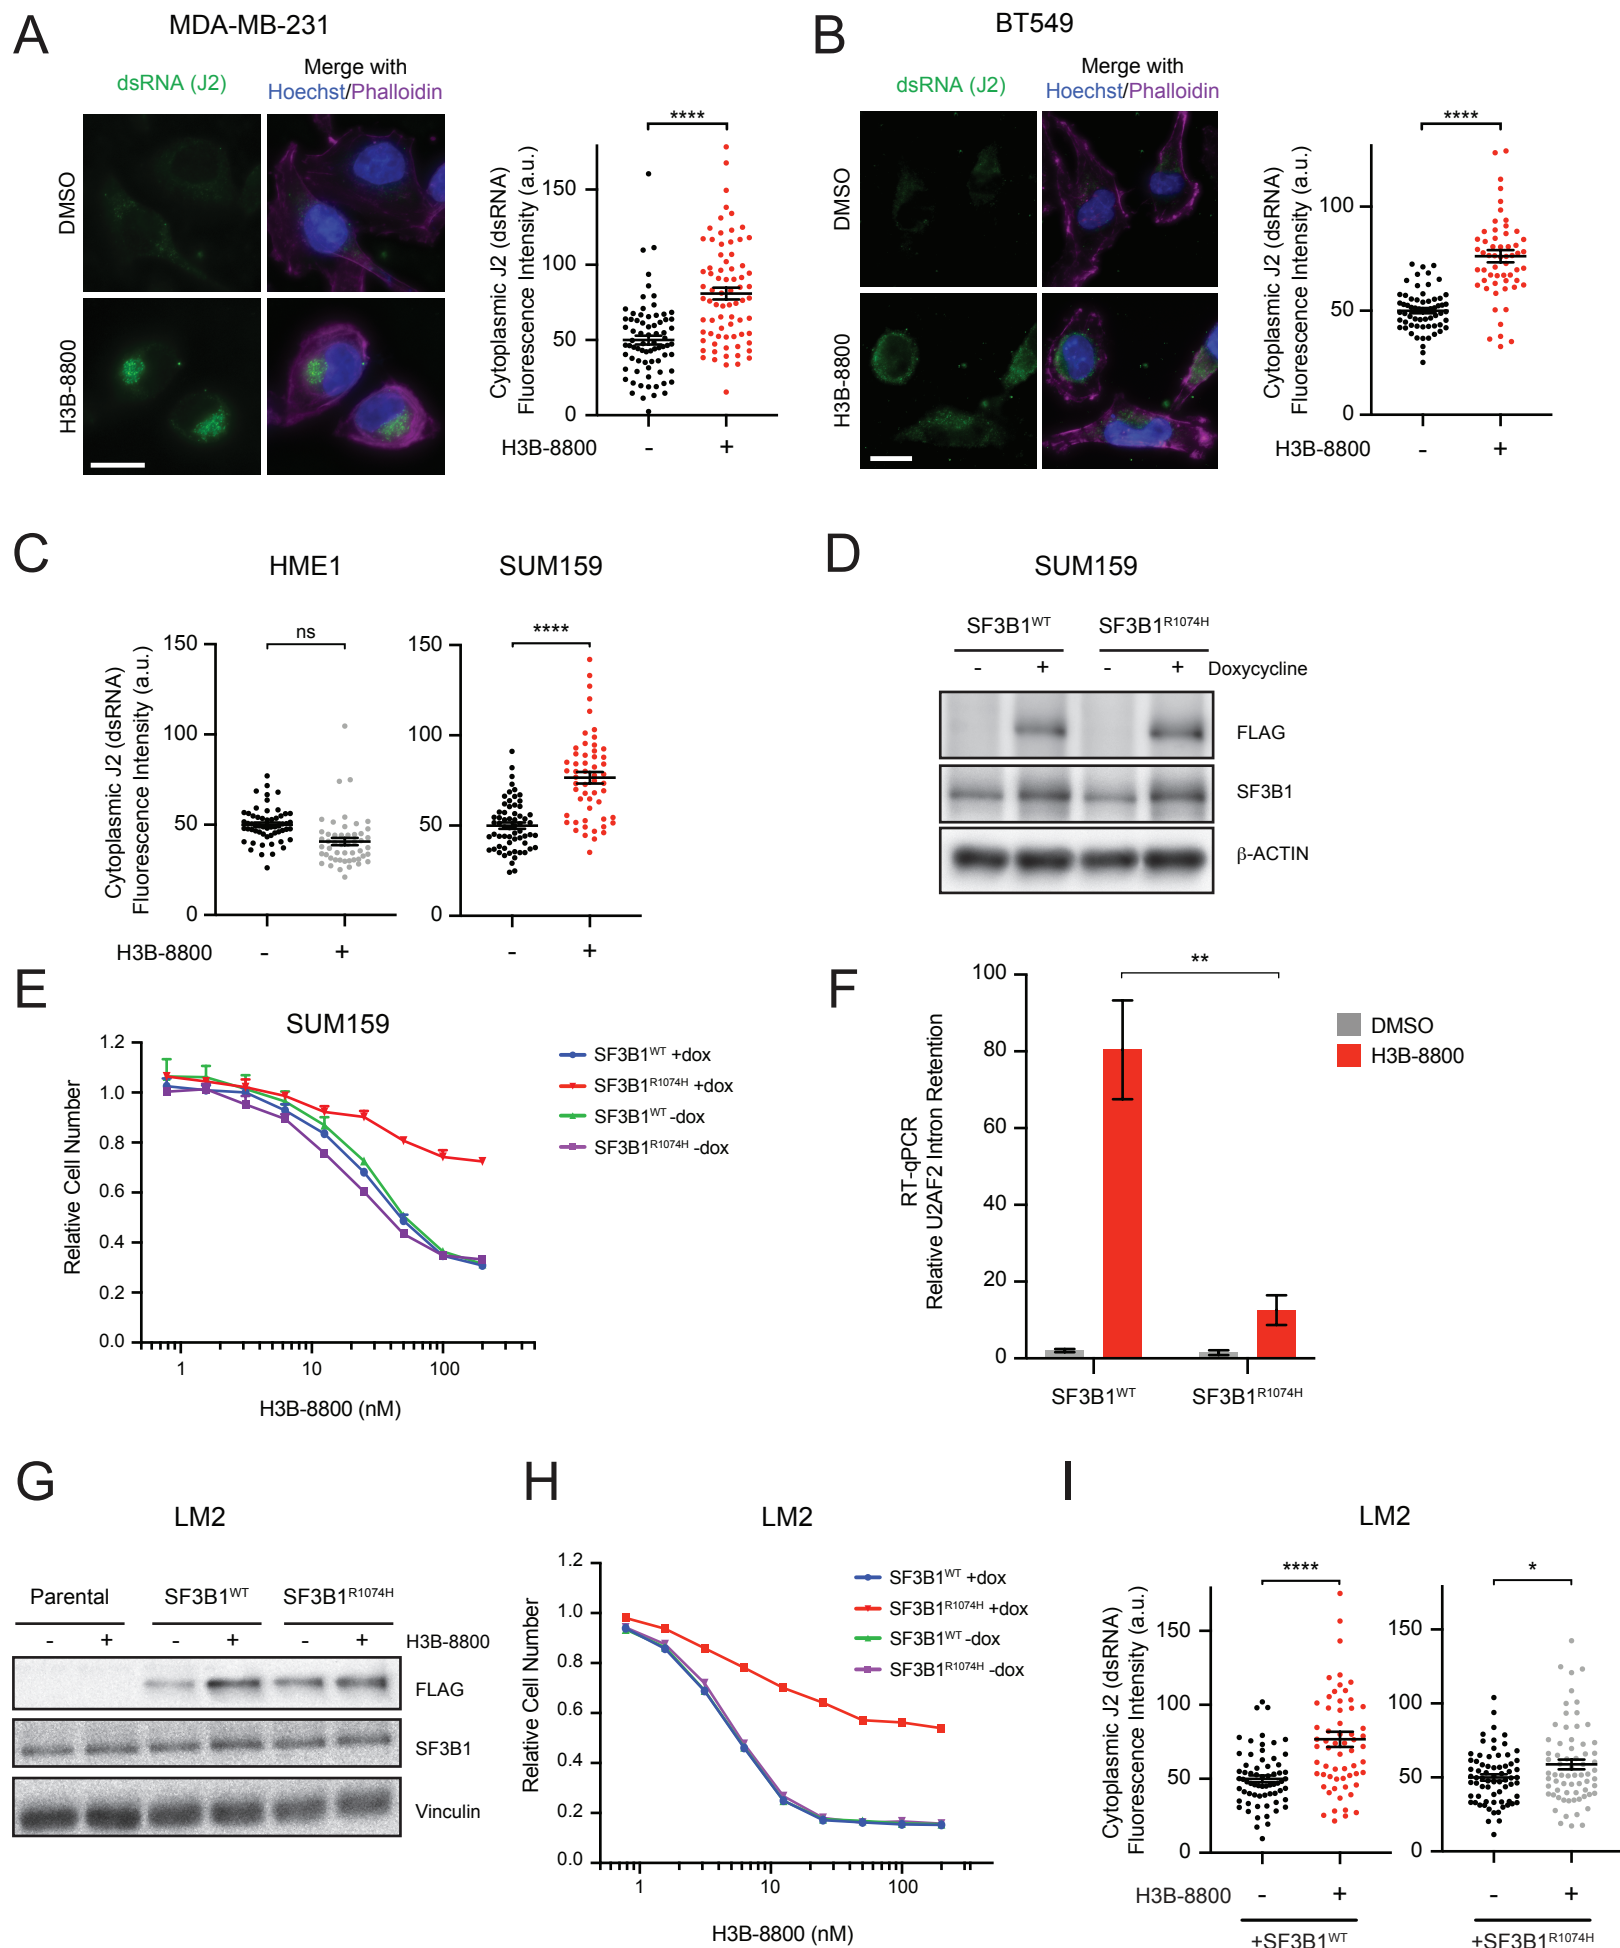

Supplement: NIHMS1663060-supplement-3.pdf [file NIHMS1663060-supplement-3.pdf]
