# Supplementary material
Source: PubMed Central journal article supplement (PMC8635244)

Figure S5. Spliceosome-Targeted Therapies Activate Extrinsic Apoptosis via dsRNA Sensing Pathways, Related to Figure 5

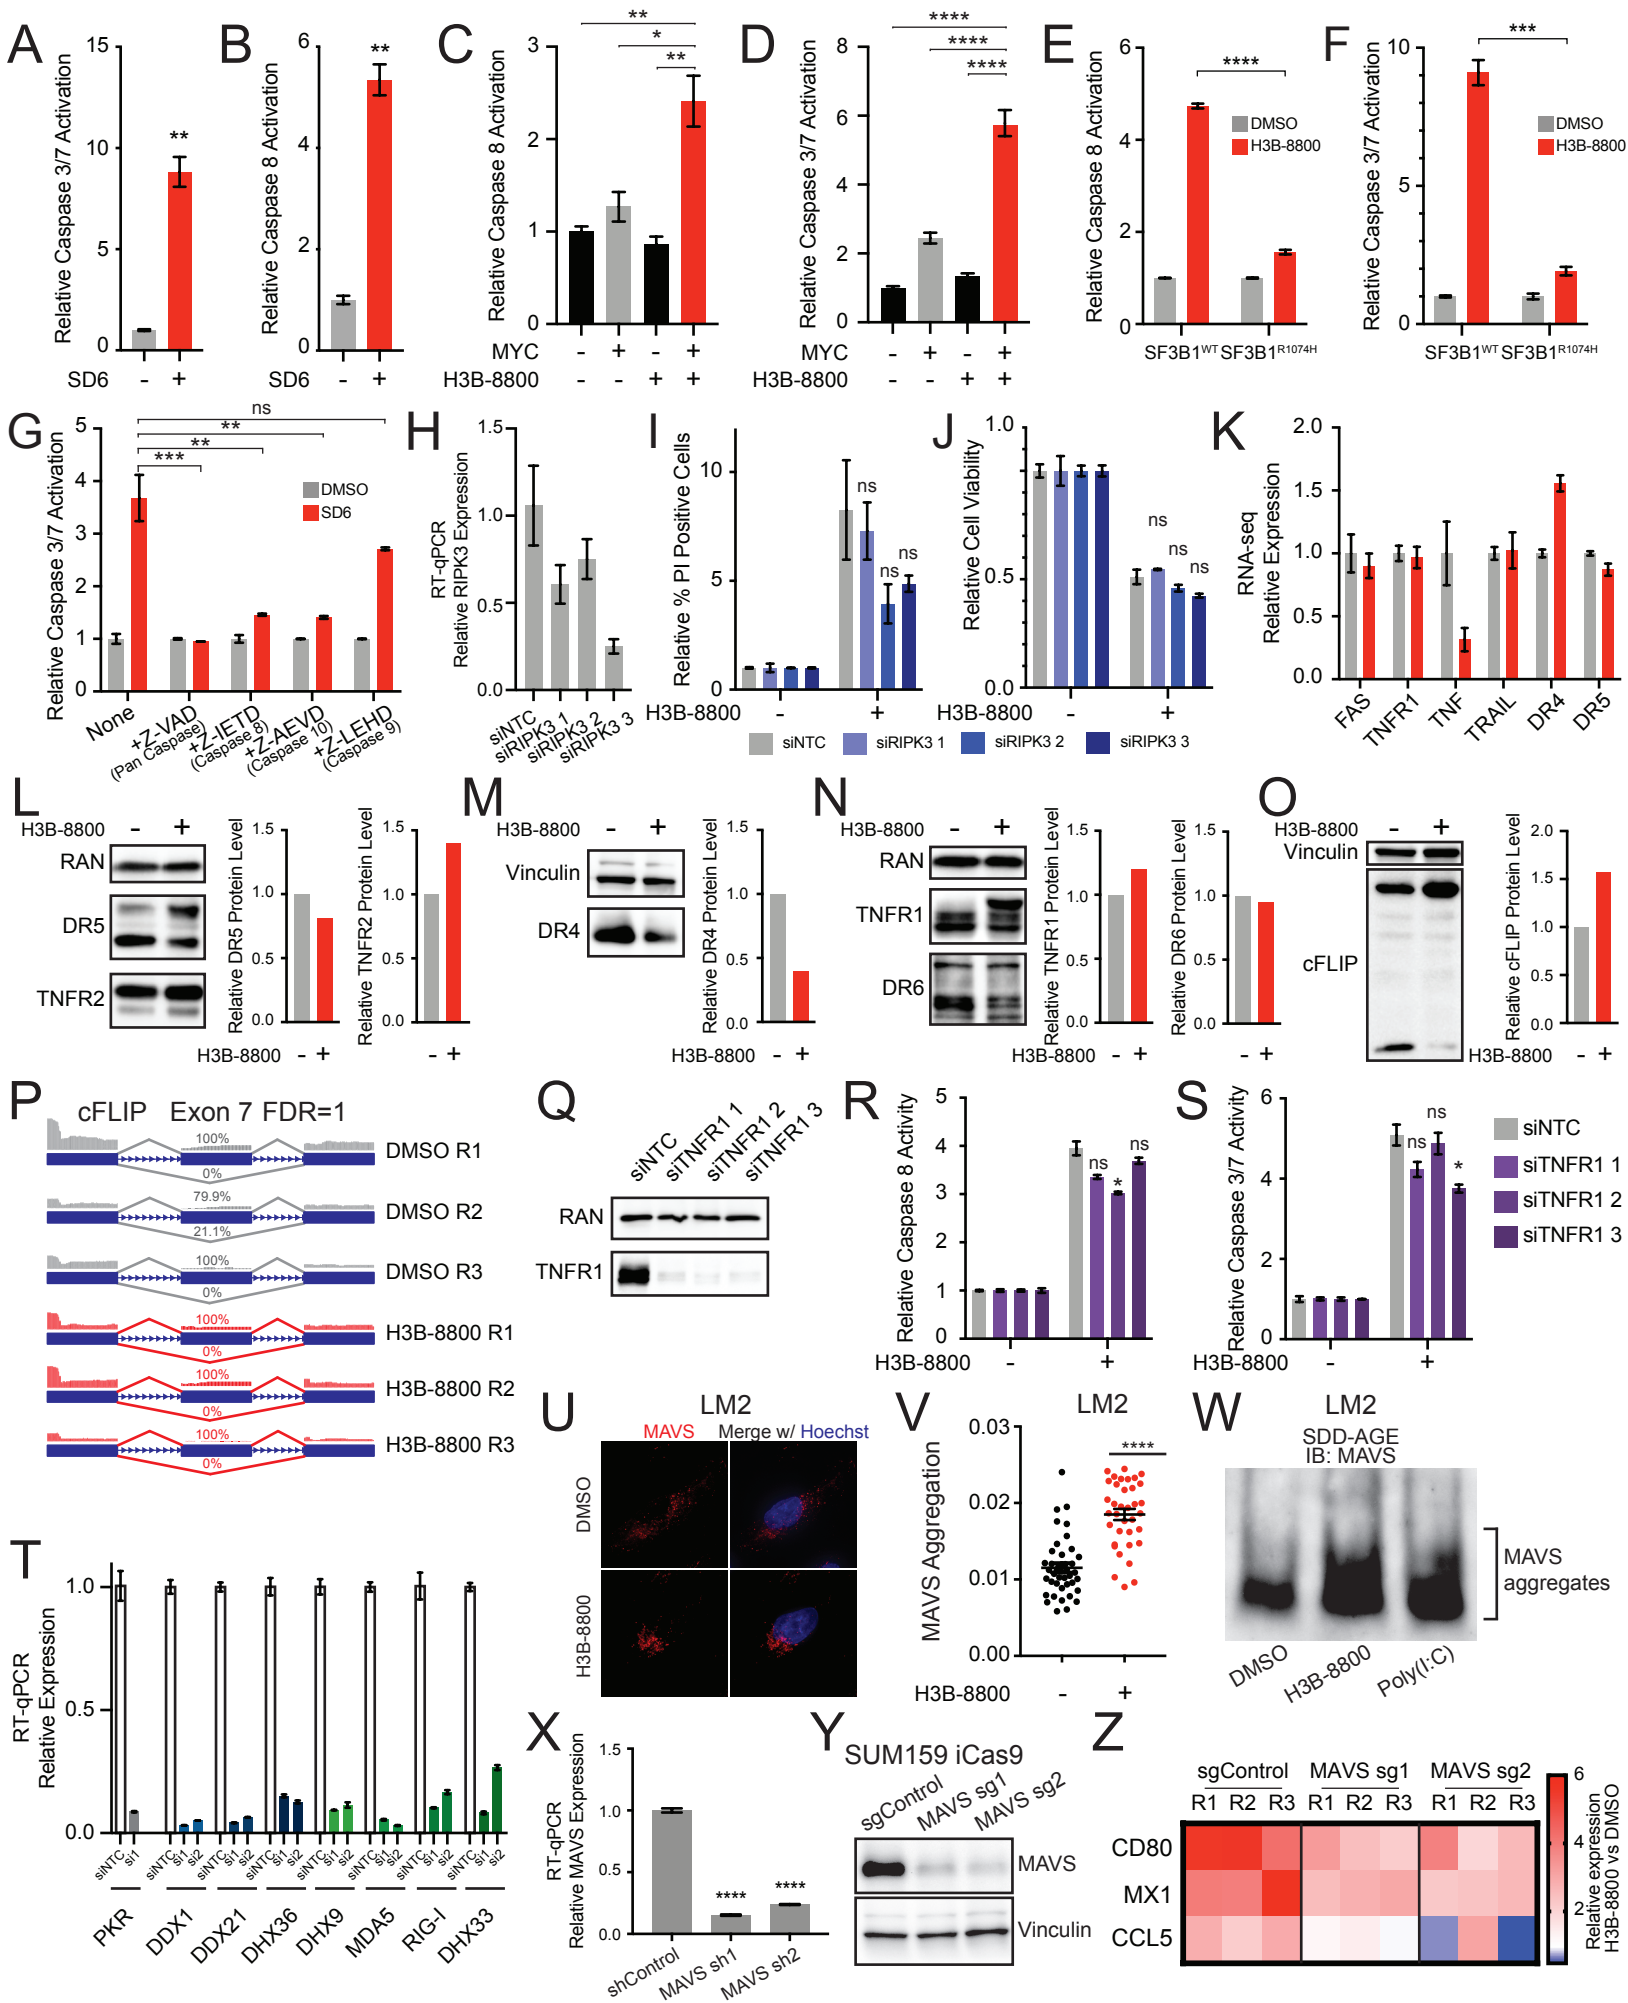

Supplement: NIHMS1663060-supplement-5.pdf [file NIHMS1663060-supplement-5.pdf]
