# Supplementary material
Source: PubMed Central journal article supplement (PMC8635244)

Figure S6. Spliceosome Inhibition Causes Differential Activation of Antiviral and Adaptive Immune Signaling in Therapy Sensitive TNBC GEMM Tumors, Related to Figure 6

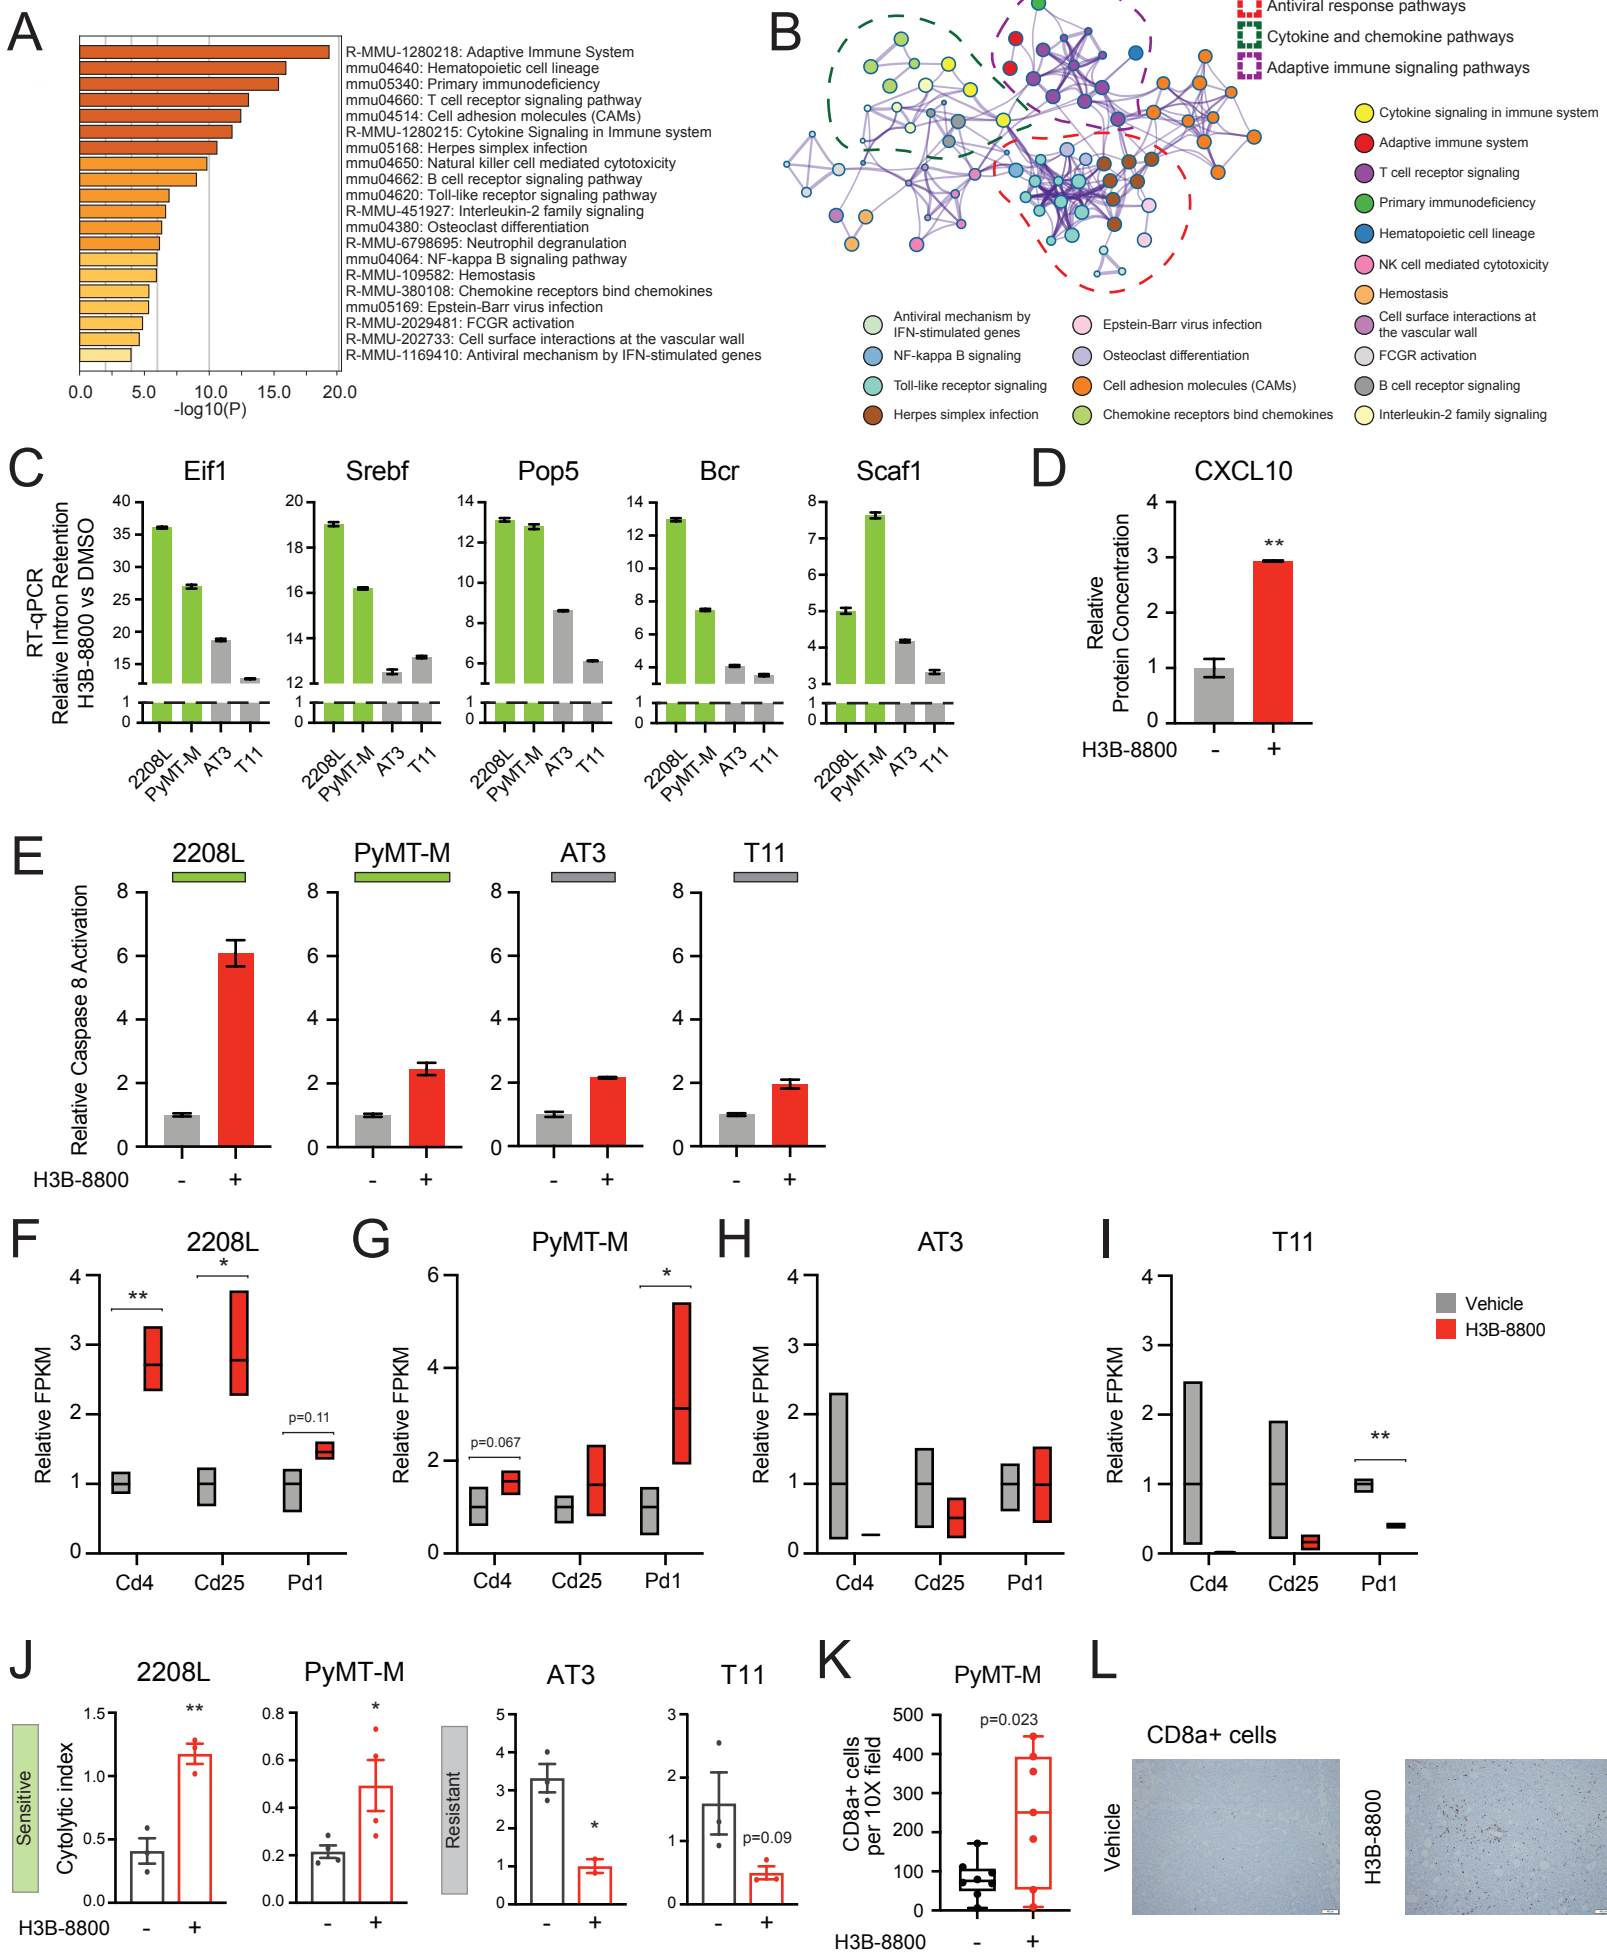

Supplement: NIHMS1663060-supplement-6.pdf [file NIHMS1663060-supplement-6.pdf]
