# Supplementary material
Source: PubMed Central journal article supplement (PMC8635244)

Figure S7. Intron Retention Levels are Anticorrelated with Tumor Mutation Burden in Human Breast Cancer, Related to Figure 7

A

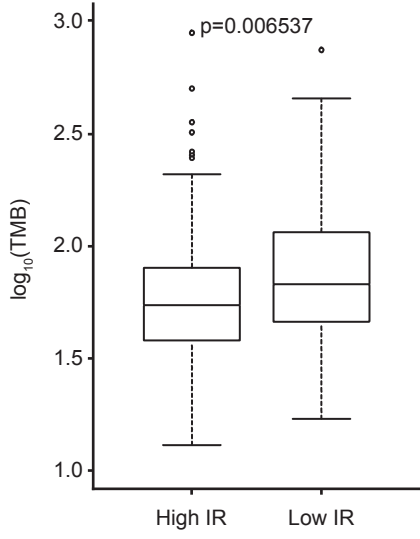

Supplement: NIHMS1663060-supplement-7.pdf [file NIHMS1663060-supplement-7.pdf]
