# Supplementary material
Source: PubMed Central journal article supplement (PMC8635244)
Supplement: NIHMS1663060-supplement-10.pdf [file NIHMS1663060-supplement-10.pdf]

**Table S1. Top 50 SD6 Resistance Candidates, Related to Figure 2**

| Gene    | Cumulative shRNA<br>log <sub>2</sub> (fold change) | Gene p-value | # of significant<br>hairpins |
|---------|----------------------------------------------------|--------------|------------------------------|
| TAOK1   | 8.04414468                                         | 1.00E-20     | 6                            |
| UBA3    | 6.63984415                                         | 1.00E-20     | 5                            |
| BAZ1A   | 5.87510061                                         | 1.00E-20     | 5                            |
| KLHL13  | 7.92046118                                         | 1.79E-13     | 8                            |
| CUL5    | 4.39125921                                         | 1.00E-20     | 4                            |
| USP8    | 6.56952388                                         | 5.63E-13     | 6                            |
| RNF182  | 6.74517742                                         | 1.41E-11     | 3                            |
| RNF128  | 4.20659046                                         | 1.85E-16     | 5                            |
| SYTL4   | 3.27353806                                         | 7.56E-18     | 3                            |
| CDC7    | 4.34694221                                         | 1.40E-13     | 5                            |
| RNF125  | 5.88971906                                         | 9.73E-10     | 5                            |
| UBE2D1  | 2.82231272                                         | 5.63E-19     | 5                            |
| UBQLN2  | 3.80693777                                         | 4.86E-14     | 4                            |
| PCGF1   | 4.73299613                                         | 4.26E-11     | 4                            |
| RNF115  | 4.3967988                                          | 1.01E-11     | 4                            |
| KCTD6   | 4.52538423                                         | 2.20E-11     | 5                            |
| ZBTB44  | 4.42752323                                         | 1.30E-11     | 4                            |
| ASB17   | 4.38528384                                         | 1.54E-11     | 4                            |
| USP40   | 3.53388064                                         | 9.14E-14     | 4                            |
| PTPN23  | 4.28792269                                         | 3.80E-11     | 3                            |
| BTRC    | 4.12880696                                         | 2.24E-11     | 4                            |
| TRIM24  | 2.20193294                                         | 1.00E-20     | 2                            |
| CYLD    | 2.15236148                                         | 1.00E-20     | 2                            |
| GUCY2C  | 4.05644529                                         | 4.06E-11     | 5                            |
| USP1    | 4.0670757                                          | 4.74E-11     | 5                            |
| MUSK    | 2.73436368                                         | 5.30E-16     | 2                            |
| FBXO3   | 3.23397803                                         | 2.03E-13     | 5                            |
| RNF13   | 4.31949409                                         | 3.84E-10     | 4                            |
| SIK2    | 3.73590999                                         | 1.44E-11     | 3                            |
| PI4KB   | 2.84187714                                         | 4.16E-14     | 2                            |
| TWF1    | 4.45823251                                         | 3.92E-09     | 4                            |
| STAM    | 2.21065948                                         | 1.83E-17     | 2                            |
| RHOBTB3 | 3.15919122                                         | 2.30E-12     | 3                            |
| KLHL5   | 3.12660851                                         | 5.88E-12     | 5                            |
| KLHL31  | 3.60106907                                         | 2.09E-10     | 3                            |
| SOCS5   | 3.79372122                                         | 7.44E-10     | 4                            |

|        |            |          |   |
|--------|------------|----------|---|
| PTPRG  | 2.09440823 | 3.44E-17 | 3 |
| MAPK8  | 2.69131243 | 5.55E-13 | 5 |
| TBK1   | 2.13179891 | 6.07E-16 | 3 |
| DRG1   | 3.54555772 | 9.37E-10 | 4 |
| GRK7   | 2.13946927 | 1.13E-15 | 2 |
| TRIM42 | 3.13974462 | 1.35E-10 | 4 |
| DUSP14 | 2.73787236 | 7.99E-12 | 2 |
| TRIM33 | 3.05028527 | 1.06E-10 | 3 |
| STK17A | 3.22911736 | 4.64E-10 | 3 |
| PEX2   | 3.74411682 | 1.30E-08 | 5 |
| WNK1   | 2.6579083  | 1.45E-11 | 4 |
| NEK11  | 1.41437839 | 1.00E-20 | 2 |
| TKT    | 2.6168577  | 2.92E-11 | 3 |
| USP34  | 3.14868563 | 1.77E-09 | 3 |

**Table S2. Resistance Candidate MeSH Enrichment, Related to Figure 2**

| MeSH Term Description               | GeneID                                | Category   | Enrichment p-value | Enrichment p-value adjusted |
|-------------------------------------|---------------------------------------|------------|--------------------|-----------------------------|
| Genome, Fungal                      | 221687/7321/84759/27246/8805/11342    |            | 4.40E-07           | 9.76E-05                    |
| G2 Phase Cell Cycle Checkpoints     | 11177/8317/7321/8945/22836/5599/79858 | Cell cycle | 4.13E-06           | 0.000457929                 |
| M Phase Cell Cycle Checkpoints      | 11177/7321/8945/1540/51592/79858      | Cell cycle | 9.45E-06           | 0.000699618                 |
| Haploidy                            | 9101/7321/25930/1540/5298             | Cell cycle | 0.00012554         | 0.006967595                 |
| Osmotic Pressure                    | 29978/23235/5599/65125                | Osmosis    | 0.00048917         | 0.021719076                 |
| Ankyrin Repeat                      | 90293/8065/7321/127247                |            | 0.000606           | 0.022421821                 |
| Clonal Anergy                       | 9101/79589/5599                       | Immune     | 0.00087295         | 0.024731605                 |
| Larva                               | 8065/9101/5599                        |            | 0.00089123         | 0.024731605                 |
| Cross-Priming                       | 27246/8945/26273                      | Immune     | 0.00117303         | 0.028934794                 |
| Pressure                            | 1540/2984/5599                        | Osmosis    | 0.00183315         | 0.038534312                 |
| Virus Inactivation                  | 8065/7321                             | Immune     | 0.00190936         | 0.038534312                 |
| Virus Release                       | 8945/8027/5599                        | Immune     | 0.00279914         | 0.049592737                 |
| DNA End-Joining Repair              | 11177/7321/79858                      |            | 0.00323365         | 0.049592737                 |
| Genes, Modifier                     | 2984/5793                             |            | 0.00326374         | 0.049592737                 |
| Mitochondrial Degradation           | 9101/7321/29110                       |            | 0.00348713         | 0.049592737                 |
| Replication Origin                  | 11177/8317/8945                       | Cell cycle | 0.00357425         | 0.049592737                 |
| RNA, Double-Stranded                | 54941/7321/29110/51592                | Immune     | 0.00402372         | 0.052545024                 |
| RING Finger Domains                 | 79589/7321/11342                      |            | 0.00446882         | 0.052804531                 |
| Genetic Fitness                     | 9101/25930/5298                       |            | 0.00451931         | 0.052804531                 |
| Protein Modification, Translational | 1540/51592                            |            | 0.00801537         | 0.088970603                 |
| Osmosis                             | 57551/5599                            | Osmosis    | 0.00880367         | 0.093067388                 |
| Immune Evasion                      | 8065/8945/29110                       | Immune     | 0.00965177         | 0.094709044                 |

|            |                |            |            |             |
|------------|----------------|------------|------------|-------------|
| Genes, cdc | 8317/7321/5793 |            | 0.0098122  | 0.094709044 |
| Chromatids | 7321/8945/8805 | Cell cycle | 0.01055343 | 0.097619264 |

**Table S4. ssGSEA TCGA IR vs. Immune Compartment Gene Signature, Related to Figure 7**

| Signature            | Correlation Coefficient | p-value   | -log10 (p-value) | BH_FDR     | -log10 (FDR) | ssGSEA_high | ssGSEA_low | Delta_ssGSEA |
|----------------------|-------------------------|-----------|------------------|------------|--------------|-------------|------------|--------------|
| T_MEMOR Y_CENTRAL    | 0.4187765               | 5.08E-43  | 42.2939063       | 1.17E-41   | 40.932178    | 0.4990108   | -0.7466821 | 1.2456928    |
| EOSINOPHILS          | 0.3032163               | 2.37E-22  | 21.6248589       | 2.73E-21   | 20.564161    | 0.588367    | -0.405587  | 0.993954     |
| T_HELPER_CELL        | 0.2882402               | 2.91E-20  | 19.5354871       | 2.23E-19   | 18.65088     | 0.4269991   | -0.6167479 | 1.043747     |
| T_MEMOR Y_EFFECTOR   | 0.2183096               | 4.53E-12  | 11.3438002       | 2.61E-11   | 10.584132    | 0.3487881   | -0.2683266 | 0.6171147    |
| T_FOLLICULAR_HELPER  | 0.2099808               | 2.94E-11  | 10.5311742       | 1.35E-10   | 9.8684164    | 0.2866724   | -0.360368  | 0.6470404    |
| CD8_T_CELLS          | 0.1116015               | 0.0004557 | 3.34131827       | 0.00174686 | 2.7577417    | 0.2671312   | -0.0900127 | 0.3571439    |
| NK_CELLS             | 0.0767315               | 0.0161178 | 1.79269484       | 0.04633861 | 1.334057     | 0.1783265   | -0.0642305 | 0.242557     |
| T_CELLS              | 0.0631186               | 0.0478835 | 1.31981393       | 0.09177675 | 1.0372673    | 0.0330376   | -0.0222619 | 0.0552994    |
| CYTOTOXIC_CELLS      | 0.0348354               | 0.2752163 | 0.56032584       | 0.42199833 | 0.3746893    | -0.0055081  | 0.0374822  | -0.0429903   |
| T_GAMMA_DELTA        | 0.0237298               | 0.4573878 | 0.33971545       | 0.61881875 | 0.2084365    | 0.0194707   | -0.0680551 | 0.0875257    |
| iDC                  | 0.0213835               | 0.5030776 | 0.29836503       | 0.64282136 | 0.1919097    | 0.134529    | 0.1539546  | -0.0194255   |
| MACROPHAGES          | 0.0047259               | 0.8823558 | 0.05435624       | 0.93304189 | 0.0300989    | -0.0429834  | -0.0487454 | 0.005762     |
| NK_CD56_DIM_CELLS    | -0.0026832              | 0.9330419 | 0.03009886       | 0.93304189 | 0.0300989    | -0.055788   | 0.0495413  | -0.1053293   |
| NK_CD56_BRIGHT_CELLS | -0.0034123              | 0.9149087 | 0.03862224       | 0.93304189 | 0.0300989    | 0.1712629   | 0.1185251  | 0.0527378    |
| TH1                  | -0.0144846              | 0.6501327 | 0.186998         | 0.7476526  | 0.1263002    | -0.0768608  | 0.0046449  | -0.0815057   |
| MAST_CELLS           | -0.0152438              | 0.6331081 | 0.19852211       | 0.7476526  | 0.1263002    | 0.0018863   | 0.1363572  | -0.1344709   |

|                                             |            |           |            |            |           |            |            |            |
|---------------------------------------------|------------|-----------|------------|------------|-----------|------------|------------|------------|
| DENDRITIC_CELLS                             | -0.0310288 | 0.3311311 | 0.47999998 | 0.47600101 | 0.3223921 | -0.0282034 | 0.1154147  | -0.1436181 |
| aDC                                         | -0.0364105 | 0.2540788 | 0.5950316  | 0.41741514 | 0.3794318 | 0.0043405  | 0.0533295  | -0.0489889 |
| TH2                                         | -0.0572221 | 0.0729311 | 1.13708738 | 0.12903191 | 0.8893029 | -0.2557284 | -0.2000029 | -0.0557255 |
| TH17                                        | -0.0682005 | 0.0325129 | 1.48794429 | 0.06798152 | 1.1676091 | -0.0968732 | -0.0019974 | -0.0948758 |
| GSE24102_Granulocytic_MDSC_VS_Neutrophil_UP | -0.0702938 | 0.0275362 | 1.56009565 | 0.06333331 | 1.1983678 | -0.1366645 | 0.112066   | -0.2487305 |
| B_CELLS                                     | -0.0702967 | 0.0275297 | 1.56019808 | 0.06333331 | 1.1983678 | -0.1789825 | 0.0907453  | -0.2697278 |
| NEUTROPHILS                                 | -0.0803011 | 0.0117846 | 1.92868615 | 0.03872074 | 1.4120564 | -0.0409211 | 0.1077468  | -0.1486679 |

**Table S5. shRNA and siRNA Sequences, Related to STAR Methods**

| <b>Figure Panel</b>                 | <b>shRNA</b>              | <b>Sequence</b>       |
|-------------------------------------|---------------------------|-----------------------|
| 2C, S2C-D                           | ZBTB1-1<br>(shControl 1)  | AACATCAGAATTTTTTGTGTA |
| 2C, S2C-D                           | TBC1D1-1<br>(shControl 2) | AGAGAAAAATTTTAAGGAGAT |
| 2C (sh1)                            | UBE2D1-1                  | ATGACTGTATCAAAAGTTTTA |
| 2C (sh2)                            | UBE2D1-2                  | ACAAACATAAACAGTAATGGA |
| 2C (sh3), 2D<br>(sh1), S2E<br>(sh1) | UBE2D1-3                  | CGGAAGTATTTGTCTCGATAT |
| 2C (sh4)                            | UBE2D1-4                  | CCCGACAGATTATCCTTTTAA |
| 2C (sh5), 2D<br>(sh2), S2E<br>(sh2) | UBE2D1-5                  | CCAGATTATCCTTTTAAACCA |
| 2C (sh1)                            | RNF128-1                  | AGCATCTTAACGTGCAACCAT |
| 2C (sh2)                            | RNF128-2                  | ATTGGGTGAATCACTATTCAA |
| 2C (sh3), 2D<br>(sh1), S2F<br>(sh1) | RNF128-3                  | ATGTGTGCATTGAATTGTATA |
| 2C (sh4), 2D<br>(sh2), S2F<br>(sh2) | RNF128-4                  | ATGTTCGAGAAATTAATCTT  |
| 2C (sh5)                            | RNF128-5                  | CGCAGTAGACATTGTTGCAAT |
| S2C (sh1)                           | USP1-1                    | AAGCATAGAGATGGACAGTAT |
| S2C (sh2)                           | USP1-2                    | CAAGGACAATCTAAAGAAAAT |
| S2C (sh3)                           | USP1-3                    | CCAAACCAAGGAGTCAAAGGA |
| S2C (sh4)                           | USP1-4                    | CACCCTATGTATGAAGGATAT |
| S2C (sh5)                           | USP1-5                    | AAAAGAGGAAATGAATGGTAT |
| S2D (sh1)                           | FBXO3-1                   | CGAGACCAAATTTTCAGATAT |
| S2D (sh2)                           | FBXO3-2                   | CCACTATCGTTCTGAAGATTT |
| S2D (sh3)                           | FBXO3-3                   | AAGGGACTGAAATACTGTCTC |
| S2D (sh4)                           | FBXO3-4                   | CCAGGATACATGGAAGGATAT |
| S2D (sh5)                           | FBXO3-5                   | ACAGAACTTAGCTCTGTACAT |
| 2C (sh1)                            | RNF125-1                  | CGGCCTGTGTTCTGTCCACTT |
| 2C (sh2)                            | RNF125-2                  | CGCAAGGTGTGTATGTCCCTT |
| 2C (sh3)                            | RNF125-3                  | AGCCTGTGTTCTGTCCACTTT |
| 2C (sh4), 2D<br>(sh1), S2G<br>(sh1) | RNF125-4                  | CCCACTACAAGAACTTGAGGA |
| 2C (sh5), 2D<br>(sh2), S2G<br>(sh2) | RNF125-5                  | CTCTGTCCACTTTGCCGTTTA |

|                         |                   |                                              |
|-------------------------|-------------------|----------------------------------------------|
| 2D, S2E-G, 5J-K, S5U    | FF2-1 (shControl) | CCCGCCTGAAGTCTCTGATTAA                       |
| 5J-K, S5U               | MAVS-1            | AACTTGGCTCCTTCTCTCT                          |
| 5J-K, S5U               | MAVS-2            | TATACTCATTCTCCTCTGG                          |
|                         |                   |                                              |
| <b>Figure Panel</b>     | <b>siRNA</b>      | <b>Sense Sequence</b>                        |
| 5E-F, S5H-J, S5O-Q, S5T | NTC               | Silencer Select Negative Control No. 1 siRNA |
| 5E-F, S5T               | PKR               | GGAACUUUGCGAUACAUGATT                        |
| 5E-F, S5T               | DDX1-1            | GAAUCUAUCCCAUUGAUCUTT                        |
| 5E-F, S5T               | DDX1-2            | GGCACCGGAUGGUUACAUUTT                        |
| 5E-F, S5T               | DDX21-1           | CUACCGCAUCAGUAACAGATT                        |
| 5E-F, S5T               | DDX21-2           | GGAGGUCAAUUUGAACGCATT                        |
| 5E-F, S5T               | DHX36-1           | CAGUGUUAGUCAUAUCGUATT                        |
| 5E-F, S5T               | DHX36-2           | CCUGUAGACUGGAAUGACATT                        |
| 5E-F, S5T               | DHX9-1            | GAGUGUAACAUCGUAGUAATT                        |
| 5E-F, S5T               | DHX9-2            | GGUUGAAGCUUACUCCGGATT                        |
| 5E-F, S5T               | MDA5-1            | GUAACAUUGUUUAUCCGUUATT                       |
| 5E-F, S5T               | MDA5-2            | GGUGUAAGAGAGCUACUAATT                        |
| 5E-F, S5T               | RIG-I-1           | GAAUUAUCCCAACCGAUUUTT                        |
| 5E-F, S5T               | RIG-I-2           | CCAGAAUUAUCCCAACCGATT                        |
| 5E-F, S5T               | DHX33-1           | CAAUGAAAGUCCCAAUGUTT                         |
| 5E-F, S5T               | DHX33-2           | UGACUCCAAUGGGAAGAAATT                        |
| S5H-J                   | RIPK3-1           | GGAGAACCAUAGAAAACCATT                        |
| S5H-J                   | RIPK3-2           | GGCAAGUCUGGAUAACGAATT                        |
| S5H-J                   | RIPK3-3           | GAACUGUUUGUUAACGUAATT                        |
| S5O-Q                   | TNFRSF1A-1        | CGGUGACUGUCCCAACUUUTT                        |
| S5O-Q                   | TNFRSF1A-2        | GAACCUACUUGUACAAUGATT                        |
| S5O-Q                   | TNFRSF1A-3        | CCCUCAAAAUAUUUCGAUUTT                        |



**Table S6. Primer Sequences used for RT-qPCR, Related to STAR Methods**

| <b>Gene</b>   | <b>Forward Primer</b>   | <b>Reverse Primer</b>      |
|---------------|-------------------------|----------------------------|
| IFNB          | CACGACAGCTCTTTCCATGA    | AGCCAGTGCTCGATGAATCT       |
| CXCL10        | TGCCATTCTGATTTGCTGCC    | TGATGGCCTTCGATTCTGGA       |
| CD80          | CGAGGGCACATACGAGTG      | ACTAGGTGTAGGGAAGTCAGC      |
| CCL3          | ACTACTTTGAGACGAGCAGC    | GACATATTTCTGGACCCACTCC     |
| TNFA          | ACTTTGGAGTGATCGGCC      | GGGTTTCGAGAAGATGATCTGAC    |
| MX1           | CTCCGACACGAGTTCCACAA    | GGCTCTTCCAGTGCCTTGAT       |
| CCL5          | TACACCAGTGGCAAGTGCTC    | TGTACTIONCCGAACCCATTTC     |
| GAPDH         | GGGGTCATTGATGGCAACAATA  | AAGGTGAAGGTCGGAGTCAAC      |
| CXCL11        | GCCTTGGCTGTGATATTGTG    | CACTTTCACTGCTTTTACCCC      |
| OAS1          | GATCTCAGAAATACCCCAGCCA  | AGCTACCTCGGAAGCACCTT       |
| IL1B          | CCACAGACCTTCCAGGAGAATG  | GTGCAGTTCAGTGATCGTACAGG    |
| UBE2D1        | CGCTGAAGAGGATTCAGAAAGA  | TCATCTCCCACAGGTCCA         |
| RNF128        | CTGGAGCCGTCATCTTTAACT   | TCATGATTGCAACAATGTCTACTG   |
| USP1          | GCTTTGGATTTACAGATTCTCAA | TCTCCTCTCACAGTTTATAGGTGAAG |
| RNF125        | CGTCACGTCCTTCGACGT      | ATACAGGAACGGCAGAATACG      |
| MAVS          | CTGCTACCAAGGTGTCT       | CTGAGCTGCCTCCAGTG          |
| NADK 1        | GGTCTTGCAGCATCACAGTC    | GGTGCAGGGAACCTGACAAAC      |
| REXO1 1       | GAGAACGTAGCACCCGTAGG    | AGCACATCTCTGAGCCCTTC       |
| MRPL40 1      | AGCCATCTGGTCGTGACTCT    | ATGACAGCAAGGTCAACGTG       |
| ACTB          | TCCCTGGAGAAGAGCTACCAG   | TCGATGCCAGAGGACTCCAT       |
| PYCARD        | CTCAGTCGGCAGCCAAG       | TCCCGTACAGAGCATCCAG        |
| MX2           | CAGCCATCGCCGTCATC       | CGGACACCTGGTTACGATTC       |
| Eif1 intron   | AGGGATCGCTGATGATTACG    | ATCAACACGGACTCCCTTGA       |
| Eif1 exon     | AGGGATCGCTGATGATTACG    | ATATGTTCTTGCCTGGTCAC       |
| Srebf1 intron | AAGGATTGCAGGTCAGACACA   | GCTGAGCTCTATGCCCTTACC      |
| Srebf1 exon   | GACACAGAAAGGCCAGTACACA  | AGTGACTCTGAGCCCGACAG       |
| Pop5 intron   | GCTGCTGATCTTGTTGCAGAA   | TGTCCTAGGGCATCGTCCTC       |
| Pop5 exon     | GCTGCTGATCTTGTTGCAGA    | CCTCCTCACCAGCACTGTCT       |
| Bcr intron    | GGTTAAAGGTGGAGAGCAATGA  | CCCTTATTTGCTCTCTGTGGAG     |
| Bcr exon      | TGGATGAATTGGAGGCACTAC   | GCCCTTATTTGCTCTCTTCTCT     |
| Scaf1 intron  | ACGCTACGTCTTGACCTGCT    | CCCTGACTCCTGTGAACGAG       |
| Scaf1 exon    | TGTGGGAAGCTCCCTTCAG     | CCCTGACTCCTGTGAACGAG       |
| U2AF2 intron  | TGTTGGTCAGACTGAGGTTG    | GTGGCACGTCCCAGTATTTA       |
| U2AF2 exon    | GAGCACGGTGGACTGATTC     | GGTGATGTGCTCAAAGCCT        |
| Cxcl10        | AGTGCTGCCGTCATTTTCTGC   | CAAGCTTCCCTATGGCCCTCA      |
| Cxcl11        | AGGAAGGTCACAGCCATAGCC   | CCATTTTGACGGCTTTCATCC      |
| Tlr9          | TCTGAGAGACCCTGGTGTGGA   | ACAAGGGGTGCAGAGTCCTTC      |
| 18s           | GTAACCCGTTGAACCCATT     | CCATCCAATCGGTAGTAGCG       |
| RIPK3         | AGAGAGAAGGAGATGGAGAAAGA | CTGGATGATGAAGTTGGAGAGAA    |
| MDA5          | GGGGCATGGAGAATAACTCA    | AGCTGACACTTCCTTCTGCC       |
| RIG-I         | ATATCCGGAAGACCCTGGAC    | GAGAAAAAGTGTGGCAGCCT       |

|       |                          |                         |
|-------|--------------------------|-------------------------|
| DDX1  | GATATCCACGGTG TTCCTTATGT | CATCCTTTCAGCTCTTCCTACTC |
| DDX21 | CGAGGAGTGACCTTCCTATTTTC  | AAGGAGAATGTCTTCCCAGTTC  |
| DHX36 | GGGAACTGCGAAGAAGGTATT    | TATCGGATGAGGGCAACAATC   |
| DHX9  | GAGGAGCCAACCTTGAAGGATTA  | TCCATGAAGCCCAGCATTTA    |
| DHX33 | ACTTCATGTCGAAGCCATCTC    | GGGTAAGCTGGTCATCCTTATG  |
