# Supplementary material
Source: PubMed Central journal article supplement (PMC8635244)

Figure S1. Spliceosome-Targeted Therapies Activate Antiviral Signaling, Related to Figure 1

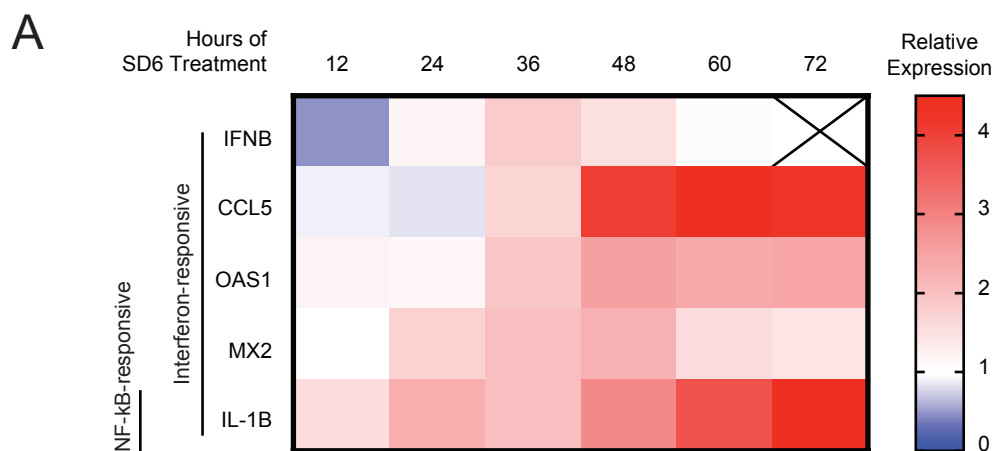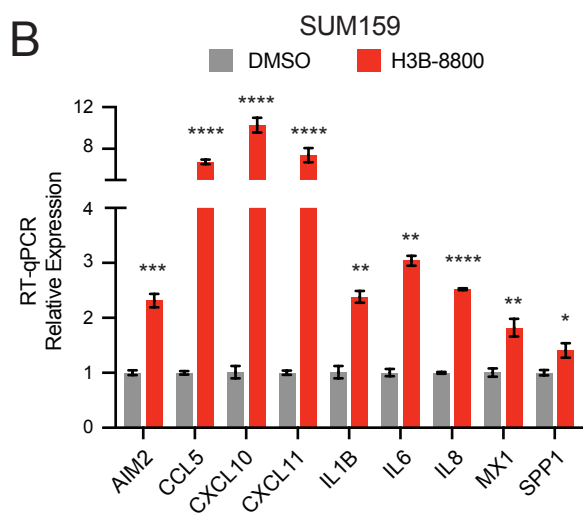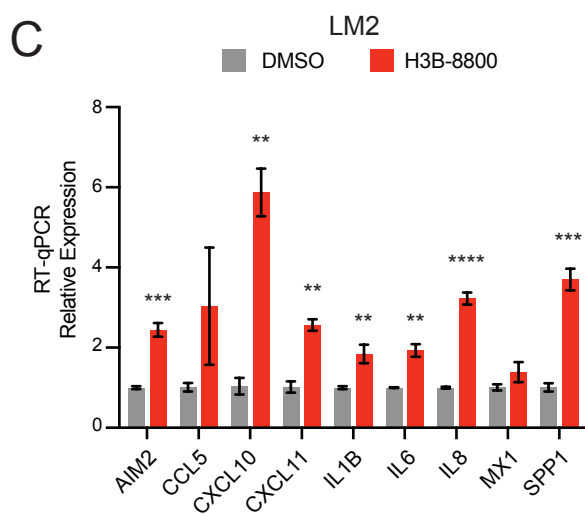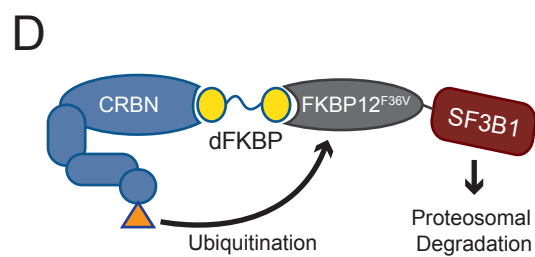

Supplement: NIHMS1663060-supplement-1.pdf [file NIHMS1663060-supplement-1.pdf]

Figure S4. Intron-Retained RNAs Accumulate in the Cytoplasm and Form dsRNA, Related to Figure 4

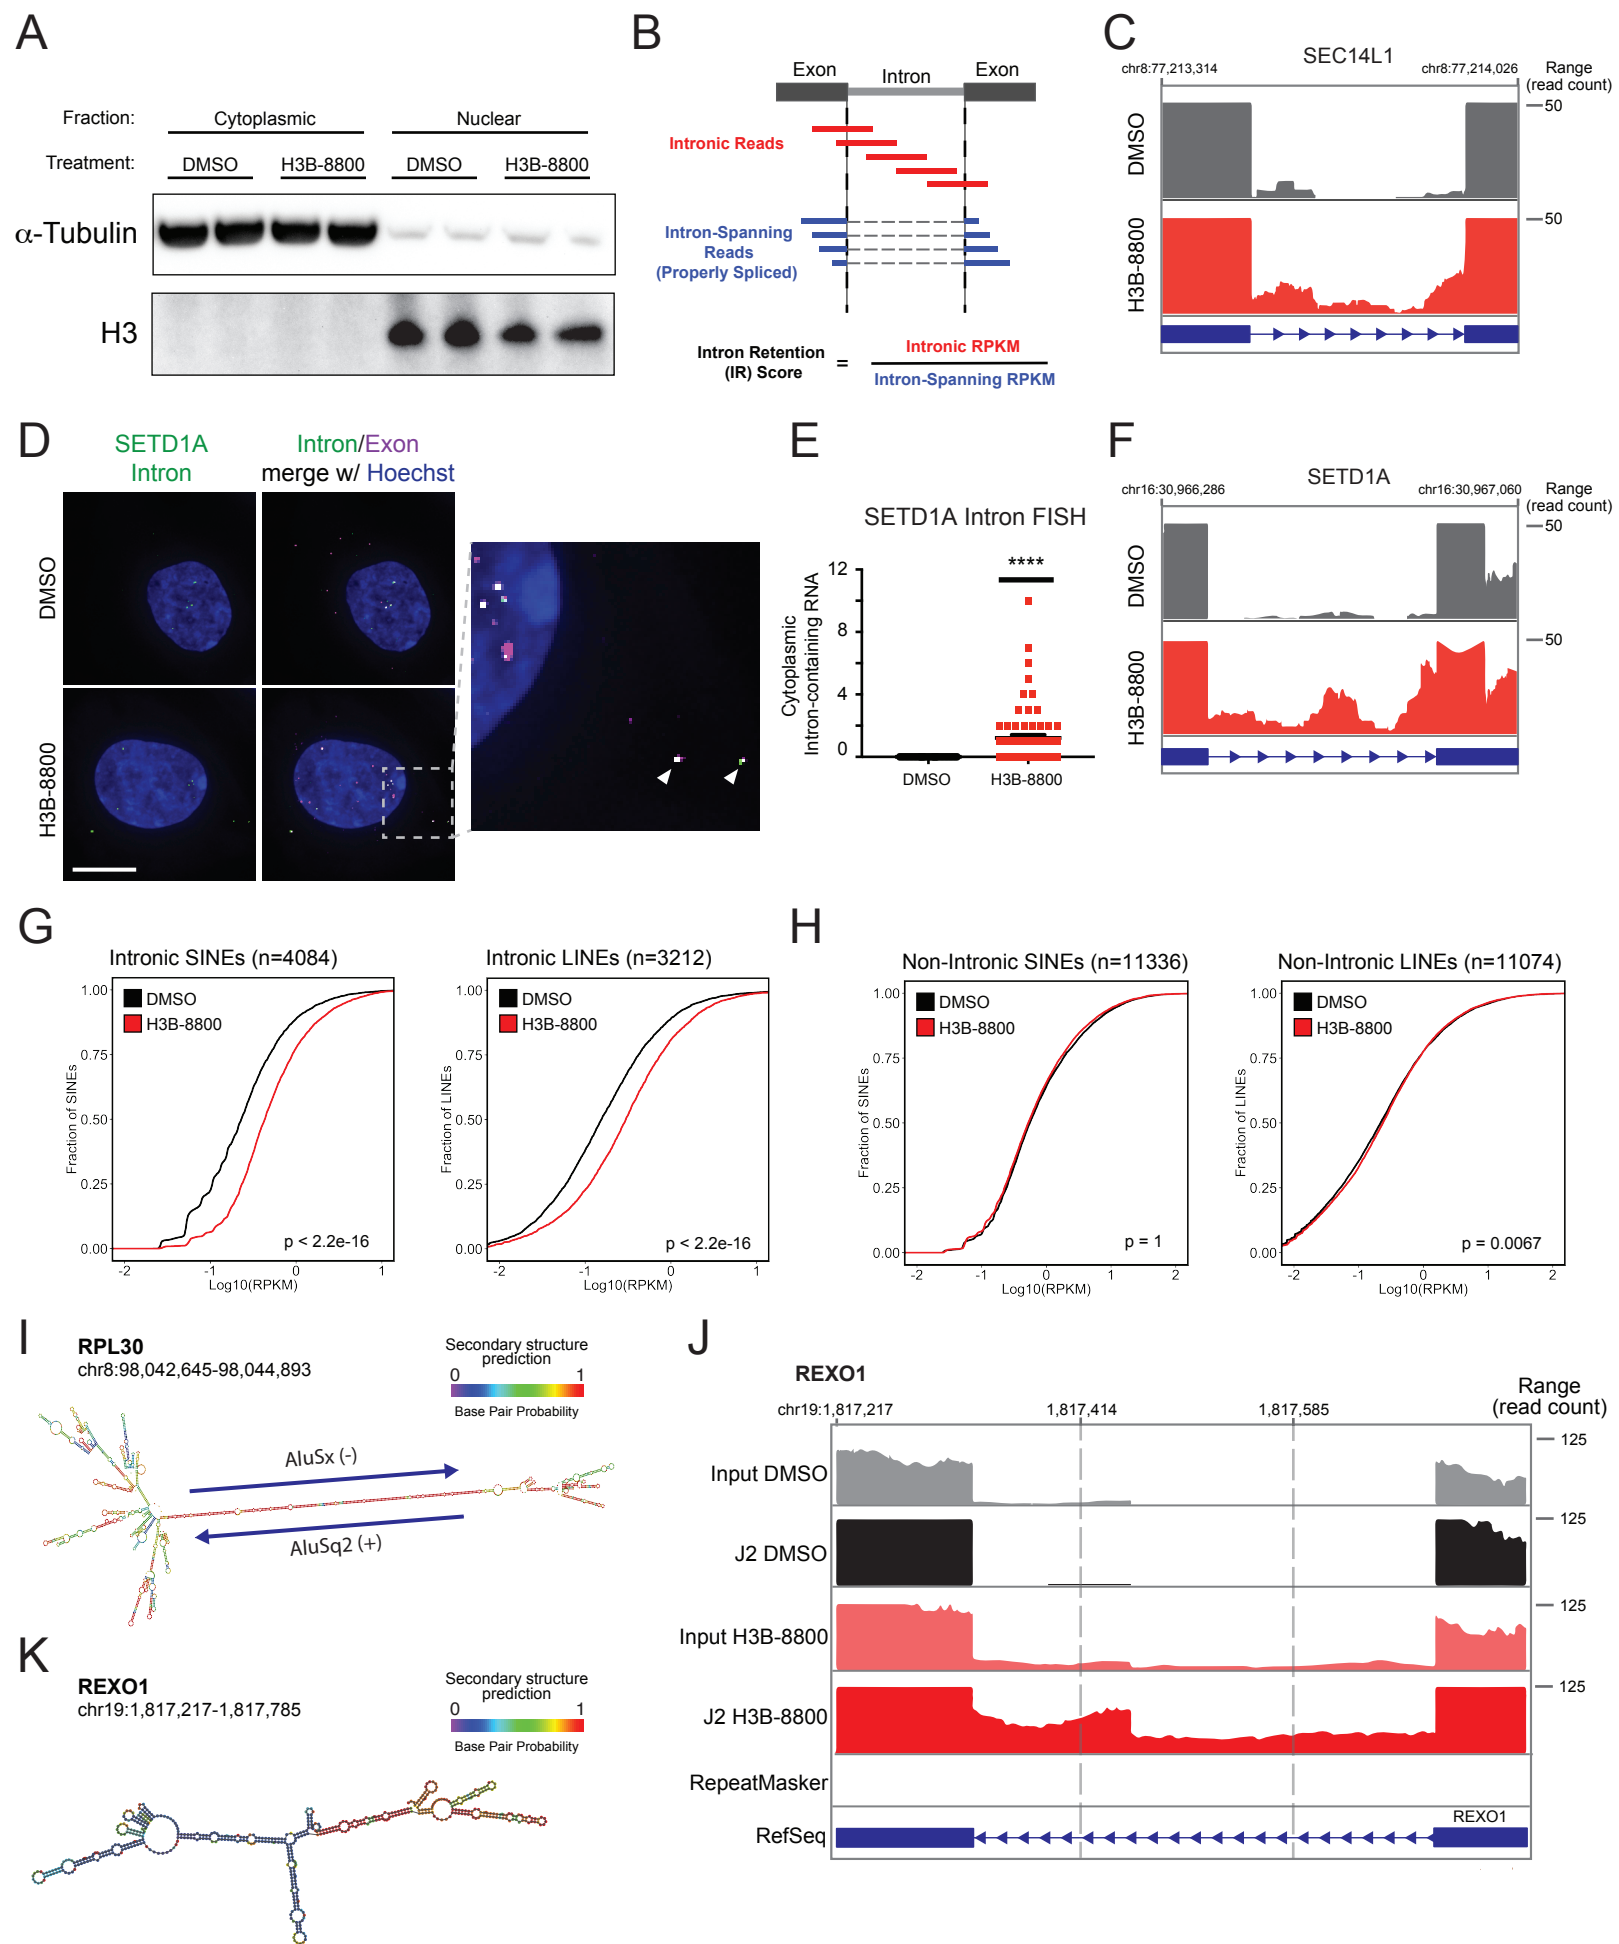

Supplement: NIHMS1663060-supplement-4.pdf [file NIHMS1663060-supplement-4.pdf]
